# Supplementary material for: Homology-driven assembly of NOn-redundant protEin sequence sets (NOmESS) for mass spectrometry
Source: PubMed Central journal article supplement (PMC4848398; doi:10.1093/bioinformatics/btv756), 2015-01-06
Supplement: supp_btv756_supplementary_material.pdf [file supp_btv756_supplementary_material.pdf]

---

*Gene expression*

## **Homology-driven assembly of NON-redundant protEin Sequence Sets (NOmESS) for mass spectrometry**

Tikira Temu<sup>1,2</sup>, Matthias Mann<sup>2</sup>, Markus Räschle<sup>2\*</sup> and Jürgen Cox<sup>1\*</sup>

<sup>1</sup>Computational Systems Biochemistry, Max Planck Inst. of Biochemistry, Am Klopferspitz 18, 82152 Martinsried, Germany

<sup>2</sup>Proteomics and Signal Transduction, Max Planck Inst. of Biochemistry, Am Klopferspitz 18, 82152 Martinsried, Germany

Received on XXXXX; revised on XXXXX; accepted on XXXXX

Associate Editor: Janet Kelso

Bioinformatics, XXXXXX

---

# Supplementary Material

This supplement contains:

-Fig. S1-S4

Fig. S1

Graphical User interface of NOmESS

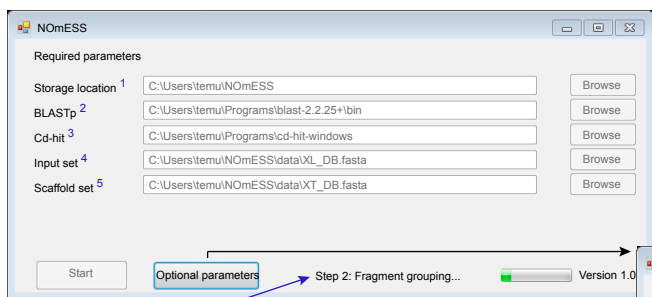

- 1 Folder storing the output
- 2 Folder containing blastp.exe and makeblastdb.exe
- 3 Folder containing cd-hit.exe
- 4 Fasta file containing amino acid sequences of the organism of interest
- 5 Fasta file containing amino acid sequences of the scaffold set (homolog organism)

Current program state

Prefixes of the fasta header for the generated sequences after each step

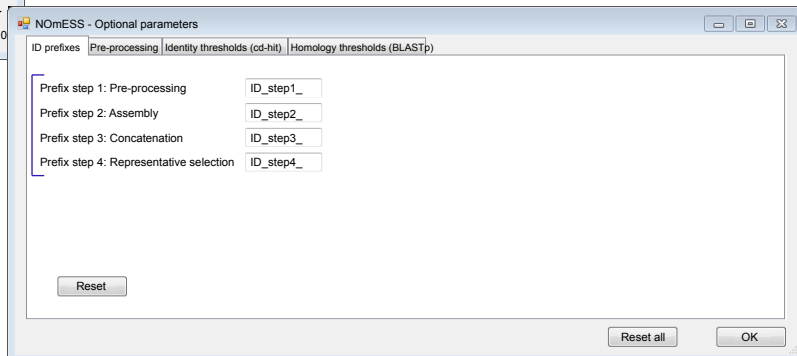

Indication, whether pre-processing should be applied

Characters that will be cut out of the sequences of the input set prior to the assembly

Sequence length threshold of the input set

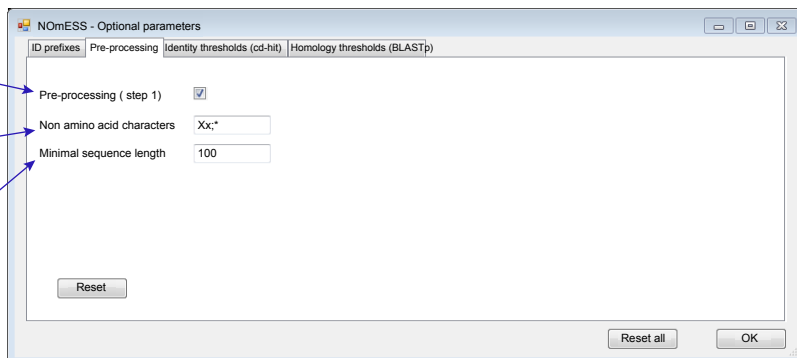

Sequence identity thresholds for cd-hit clustering of the scaffold set and the generated sequence sets after each step

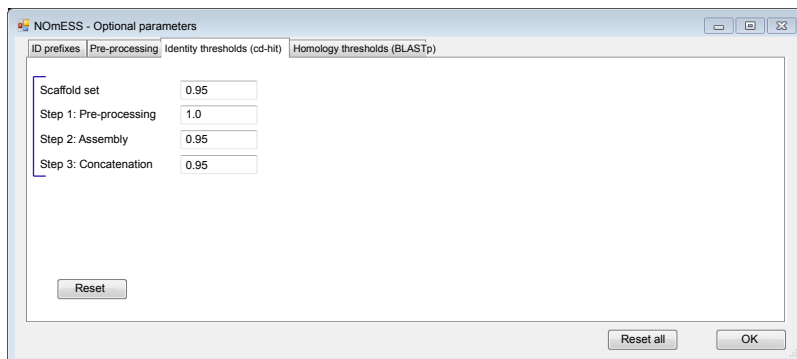

Thresholds to filter BLAST hits for every step

Sequence identity of overlapping sequences in the assembly step

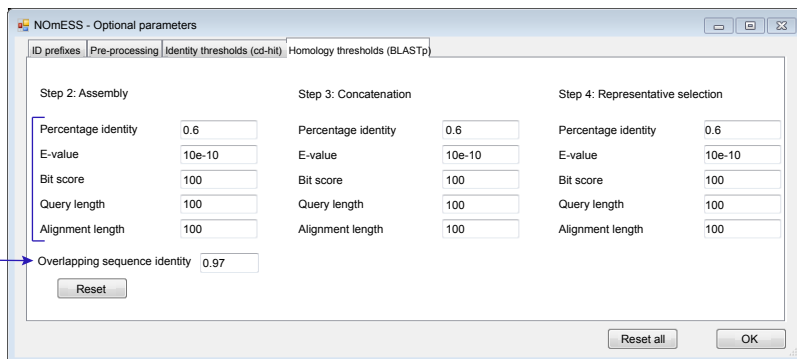

**Fig. S1 Graphical User interface of NOmESS.** The graphical user interface consists of a main window containing the required parameters, whereas the optional parameters can be found in a pop-up window with 4 tabs. The optional parameter values of the screenshots above are NOmESS' default values. Parameter descriptions are highlighted in blue.

Fig. S2

Flowchart of the NOMESS algorithm

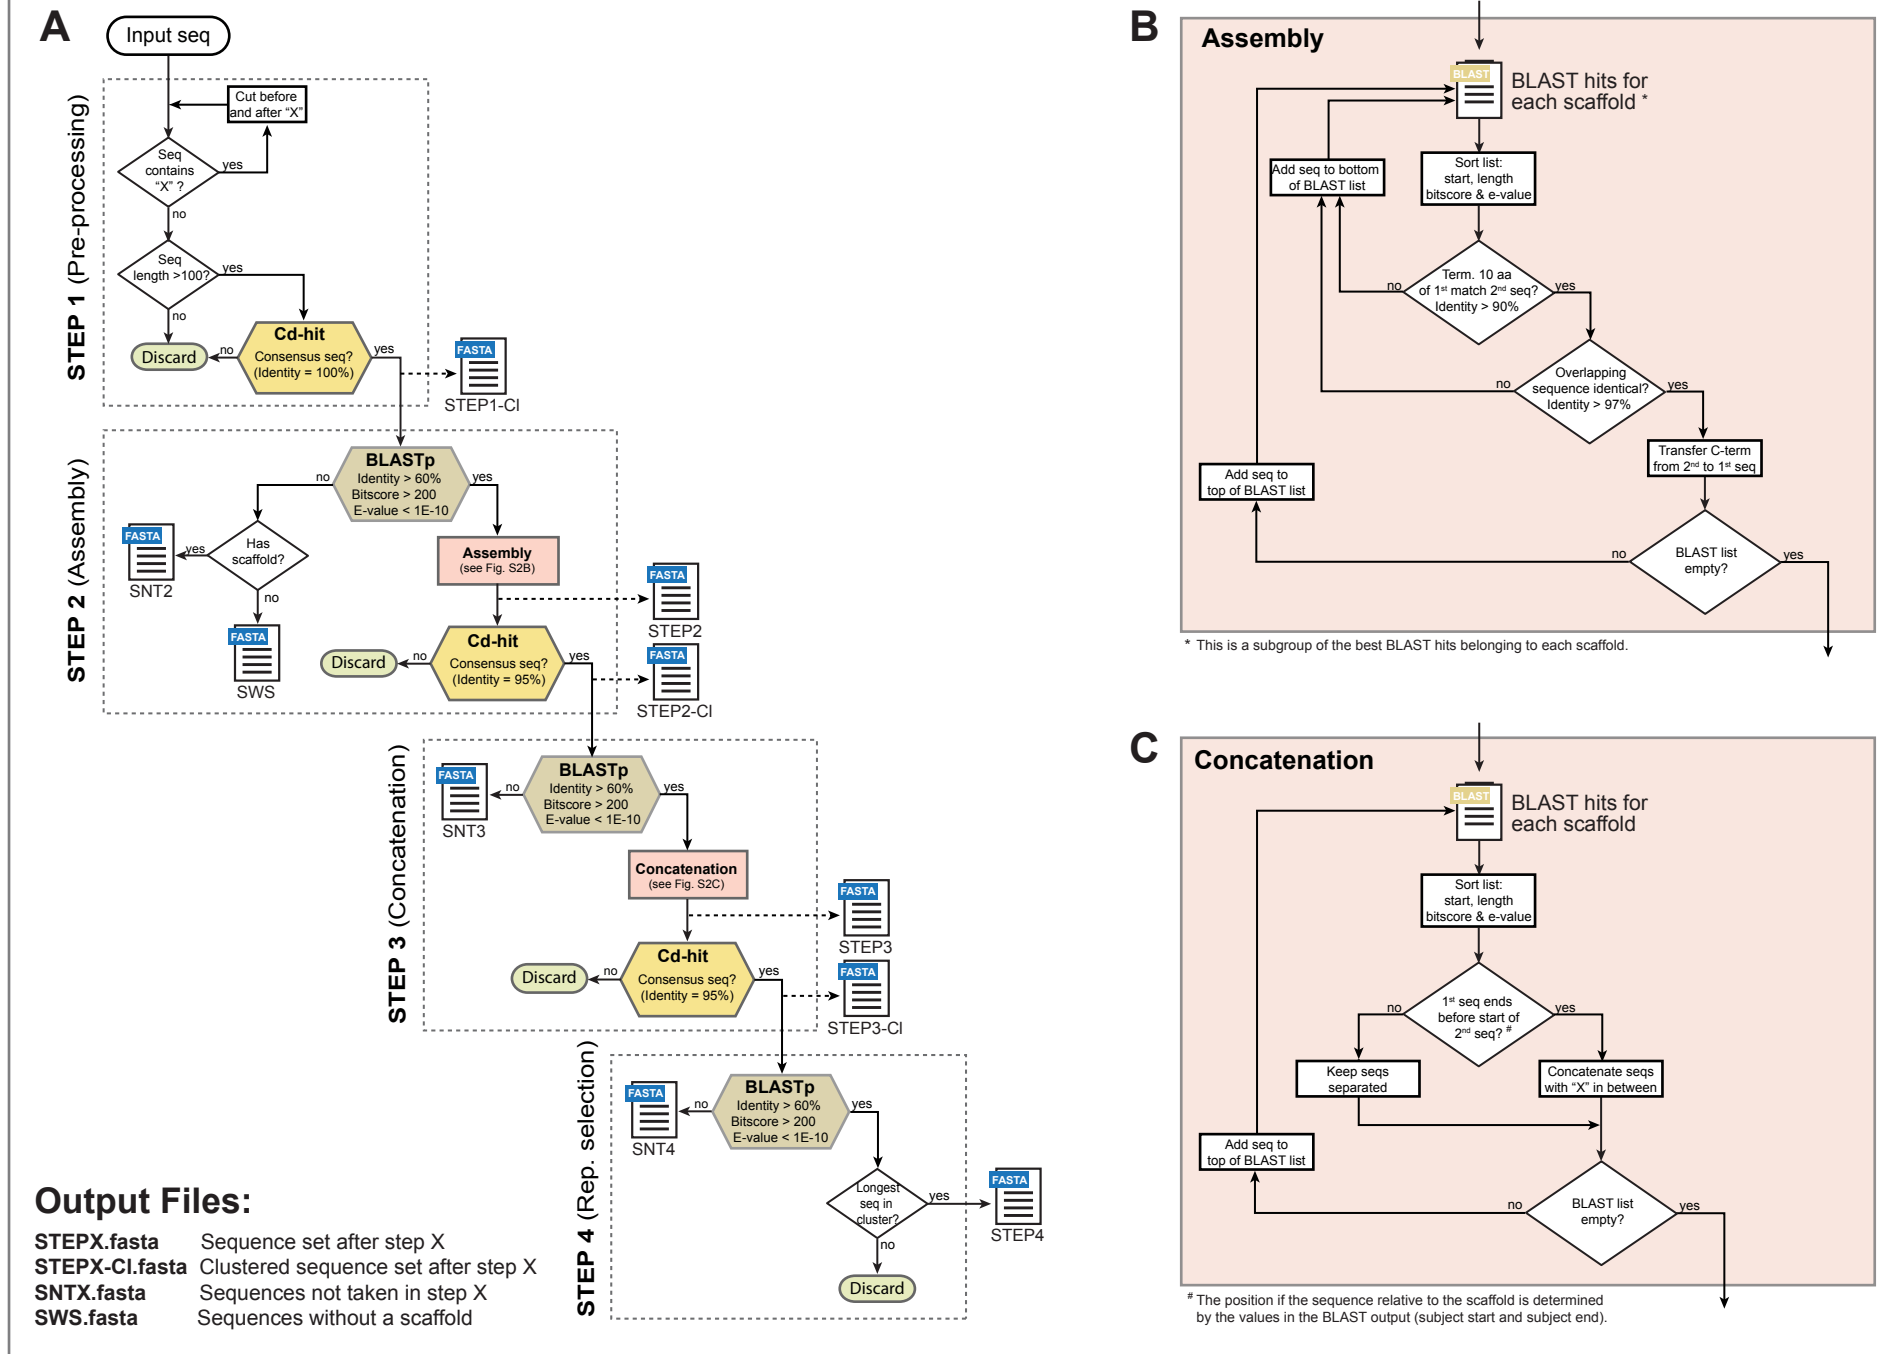

**Fig. S2 Flowchart of the NOMESS algorithm.** (A) Iterative BLAST searches and cd-hit clustering are used to align sequences to the scaffold, retrieve their relative position and find the representative of each sequence after each step. (B-C) Detailed view of the assembly and the concatenation module (step 2 and step 3 respectively). Abbreviations: seq: sequence, rep.: representative, Term.: terminal, aa: amino acid

Fig. S3

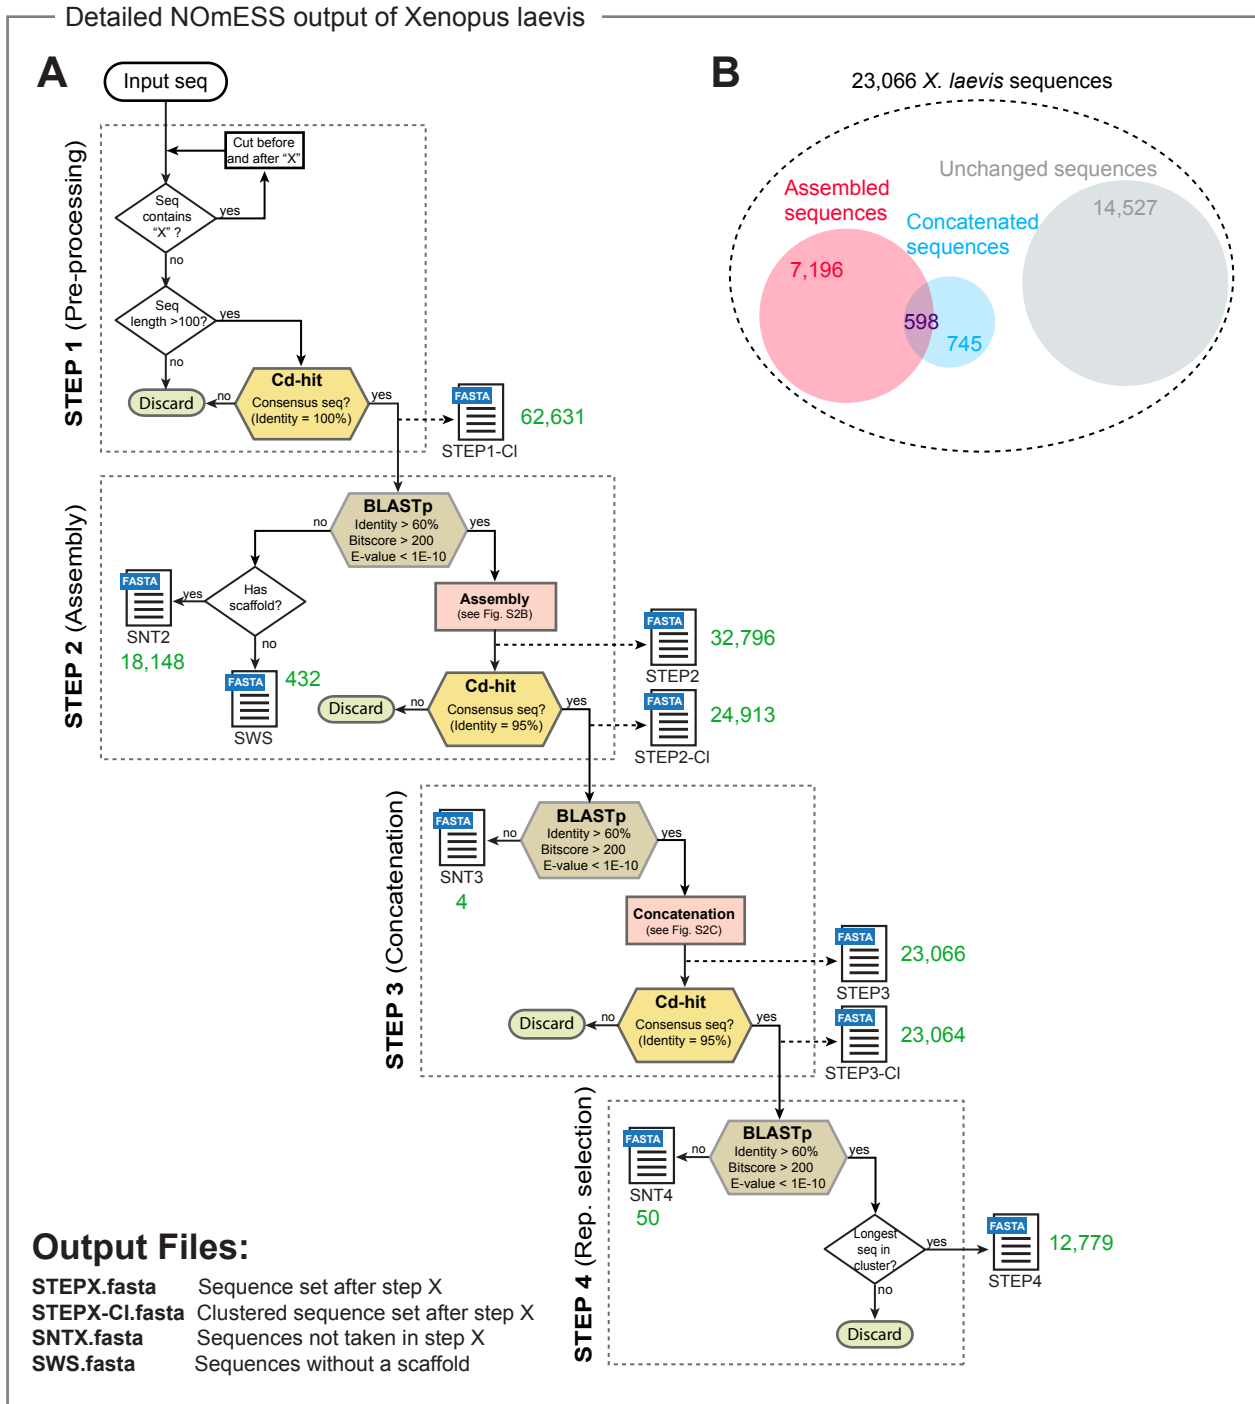

**Fig. S3 NOMESS assembly of *X. laevis* sequences along a *X. tropicalis* scaffold.** (A) Sequences retrieved from various repositories (e.g. TIGR gene indices, Xenbase, contigs from Gurdon, Unigene or XGI, see <http://www.biochem.mpg.de/cox>) were assembled using amino acid sequences from *X. tropicalis* as a scaffold. The Flowchart indicates the number of sequences generated during each step of the NOMESS procedure (see green numbers next to the output files). (B) Venn diagram showing the number of *X. laevis* sequences that were assembled and/or concatenated. Divergence of *X. laevis* and *X. tropicalis* has been estimated to have occurred about 63.7 million years ago (Evans et. al., 2007).

Fig. S4

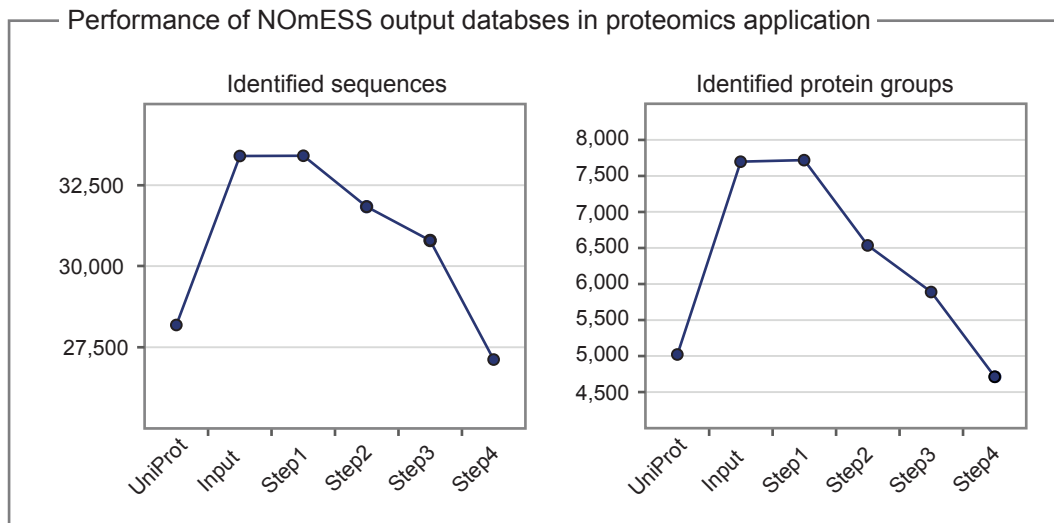

**Fig. S4 Comparison of proteomic analyses of a *X. laevis* egg extracts using NOmESS or UniProt databases.** A small mass spectrometry data set acquired from a fractionated egg extract (see Räsche, et al., 2015) was analysed with MaxQuant using the latest available UniProt database or various outputs of the NOmESS pipeline (see Fig. S3). The number of identified peptides (left panel) or “protein groups” (right panel) are plotted for each analysis.
